# Supplementary material for: Bioaccumulation of Blood Long-Chain Fatty Acids during Hemodialysis
Source: MDPI journal article supplement (doi:10.3390/metabo12030269), 2022-03-21
Supplement: s1 [file s1]

**Table S1 Clinical parameters of patients (n=12).**

| Parameters                       | Patients      |
|----------------------------------|---------------|
| Glucose ( 60-110 mg/dL)          | 115.8 ± 36.7  |
| Total cholesterol ( < 200 mg/dL) | 221.8 ± 181.2 |
| LDL-cholesterol ( < 130 mg/dL)   | 101.2 ± 30.7  |
| HDL- cholesterol ( >35 mg/dL)    | 42.4 ± 9.9    |
| Triglycerides ( <200 mg/dL)      | 151.0 ± 77.4  |

Notes: Data are presented as mean ± SD.

**Table S2.** Effect of hemodialysis on polyunsaturated fatty acid ratios in venous plasma and RBC in the CKD patients before (Pre-HD) and at cessation (Post-HD) of hemodialysis (n=12 each).

| Ratio               | pre-HD Venous                   | post-HD Venous                  | p value, t test<br>(# paired<br>Wilcoxon test) |
|---------------------|---------------------------------|---------------------------------|------------------------------------------------|
| <b>Total-Plasma</b> |                                 |                                 |                                                |
| DHA+EPA/AA          | 0.7514 (0.6267 –0.8752 )        | 0.6516 (0.5946 –0.8166 )        | 0.127                                          |
| EPA/AA              | 0.0983 (0.0700 –0.1537 )        | 0.0806 (0.0715 –0.1303 )        | 0.286#                                         |
| DHA/AA              | 0.6359 (0.5586 –0.6793 )        | 0.5780 (0.5115 –0.6609 )        | 0.182#                                         |
| DHA/EPA             | 6.5543 (5.1800 –7.4374 )        | 6.5892 (5.8563 –7.3498 )        | 0.793                                          |
| n-3/n-6             | 0.1834 (0.1511 –0.2118 )        | 0.1651 (0.1541 –0.2176 )        | 0.81                                           |
| <b>Total-RBC</b>    |                                 |                                 |                                                |
| Omega-3 quotient    | 11.3752 (7.7099 –12.1713 )      | 11.3738 (8.3040 –12.5440 )      | 0.676                                          |
| DHA+EPA/AA          | 0.6547 (0.5208 –0.9044 )        | 0.7027 (0.6151 –0.8107 )        | 0.826                                          |
| EPA/AA              | 0.0341 (0.0295 –0.0575 )        | 0.0421 (0.0335 –0.0512 )        | 0.404                                          |
| DHA/AA              | 0.6202 (0.5050 –0.8469 )        | 0.6605 (0.5833 –0.7487 )        | 0.89                                           |
| DHA/EPA             | 15.2611 (14.5957 –<br>21.7166 ) | 17.3803 (13.4656 –<br>20.3596 ) | 0.433#                                         |
| n-3/n-6             | 0.4098 (0.3518 –0.5048 )        | 0.4095 (0.3878 –0.4616 )        | 0.701                                          |

Notes: Median (IQR)

**Table S3.** Effect of hemodialysis on the ratio of desaturase and peroxisome function in venous plasma and RBC in the CKD patients before (Pre-HD) and at cessation (Post-HD) of hemodialysis (n=12 each).

| Ratio                                 | pre-HD Venous             | post-HD Venous            | p value, t test<br>(# paired<br>Wilcoxon test) |
|---------------------------------------|---------------------------|---------------------------|------------------------------------------------|
| <b>Total-Plasma</b>                   |                           |                           |                                                |
| DHA/DPA                               | 8.9873 (7.0171 –10.7715 ) | 9.0468 (6.5445 –13.8399 ) | 0.468                                          |
| C20:4 n-6/C20:3 n-6 ( $\Delta$ 5 SCD) | 3.5725 (3.2953 –4.0303 )  | 3.9063 (3.3146 –4.7591 )  | 0.088                                          |
| C18:3 n-6/C18:2 n-6 ( $\Delta$ 6 SCD) | 0.0149 (0.0102 –0.0185 )  | 0.0167 (0.0112 –0.0204 )  | 0.556#                                         |
| C16:1 n-7/C16:0 ( $\Delta$ 9 SCD)     | 0.0880 (0.0808 –0.1015 )  | 0.0859 (0.0763 –0.0921 )  | 0.053                                          |
| C18:1 n-9/C18:0 ( $\Delta$ 9 SCD)     | 5.7640 (4.6422 –7.0182)   | 6.0049 (4.9686 –6.2736)   | 0.599                                          |
| <b>Total-RBC</b>                      |                           |                           |                                                |
| DHA/DPA                               | 5.0147 (3.5409 –5.9286 )  | 4.9854 (4.3682 –5.8391 )  | 0.877                                          |
| C20:4 n-6/C20:3 n-6 ( $\Delta$ 5 SCD) | 8.0572 (6.6672 –10.3164 ) | 8.1449 (7.5088 –10.8905 ) | 0.814#                                         |
| C18:3 n-6/C18:2 n-6 ( $\Delta$ 6 SCD) | 0.0108 (0.0067 –0.0131 )  | 0.0110 (0.0068 –0.0136 )  | 0.429                                          |
| C16:1 n-7/C16:0 ( $\Delta$ 9 SCD)     | 0.0437 (0.0328 –0.0569 )  | 0.0479 (0.0380 –0.0574 )  | 0.371                                          |
| C18:1 n-9/C18:0 ( $\Delta$ 9 SCD)     | 1.2582 (0.9138 –1.5227)   | 1.3379 (1.1765 –1.4844)   | 0.275                                          |

Notes: Median (IQR)
